# Supplementary material for: In-situ X-ray powder diffraction studies of hydrothermal and thermal decomposition reactions of basic bismuth(iii) nitrates in the temperature range 20–650 °C
Source: Royal Society of Chemistry journal article supplement (doi:10.1039/b303926a), 2003-01-01
Supplement: b303926a.doc [file b303926a.doc]

**Supplementary data for the publication:**

***In-situ* X-ray powder diffraction studies of hydrothermal and thermal decomposition reactions of basic bismuth(III) nitrates in the temperature range 20-650oC**

***J. Chem. Soc., Dalton Trans***, 2003,

**Axel Nørlund Christensen,a Torben René Jensen,b Nicola V. Y. Scarlett,c Ian C. Madsen,c Jonathan C. Hanson,d and Angela Altomaree**

**Graphical content entry**

***In-situ* X-ray powder diffraction studies of hydrothermal and thermal decomposition reactions of basic bismuth(III) nitrates in the temperature range 20-650oC**

Axel Nørlund Christensen, Torben René Jensen, Nicola V. Y. Scarlett, Ian C. Madsen, Jonathan C. Hanson, and Angela Altomare

**Abstract**

The syntheses of basic bismuth(III) nitrates under hydrothermal conditions and their dry decomposition to -Bi2O3 in solid state reactions was investigated by *in-situ* synchrotron X-ray radiation powder diffraction. Three basic bismuth(III) nitrates with known structures are: [Bi6O4(OH)4](NO3)64H2O, **C**, [Bi6O4(OH)4](NO3)6H2O, **D**, and [Bi6O5(OH)3](NO3)53H2O, **A**. They contain the complex ions [Bi6O4(OH)4]6+ and{[Bi6O5(OH)3]5+}2, respectively. A fourth basic bismuth(III) nitrate, **X**, apparently has the composition [Bi6O4.5(OH)3.5](NO3)5.5H2O according to chemical analysis. The transformation of **C** via **D** to **X**, or of **C** directly to **X** was established in the *in-situ* hydrothermal synthesis. Similarities in the decomposition paths of **C**, **D** and **X** in the solid state *in-situ* investigations support the above composition indicated for **X**. The compound **A** has a decomposition path different from those of **C**, **D** and **X**. This is consistent with the complex ion {[Bi6O5(OH)3]5+}2 in **A**, being different from the complex ion [Bi6O4(OH)4]6+ in the other two basic bismuth(III) nitrates. All four compounds have -Bi2O3 as the final decomposition product.


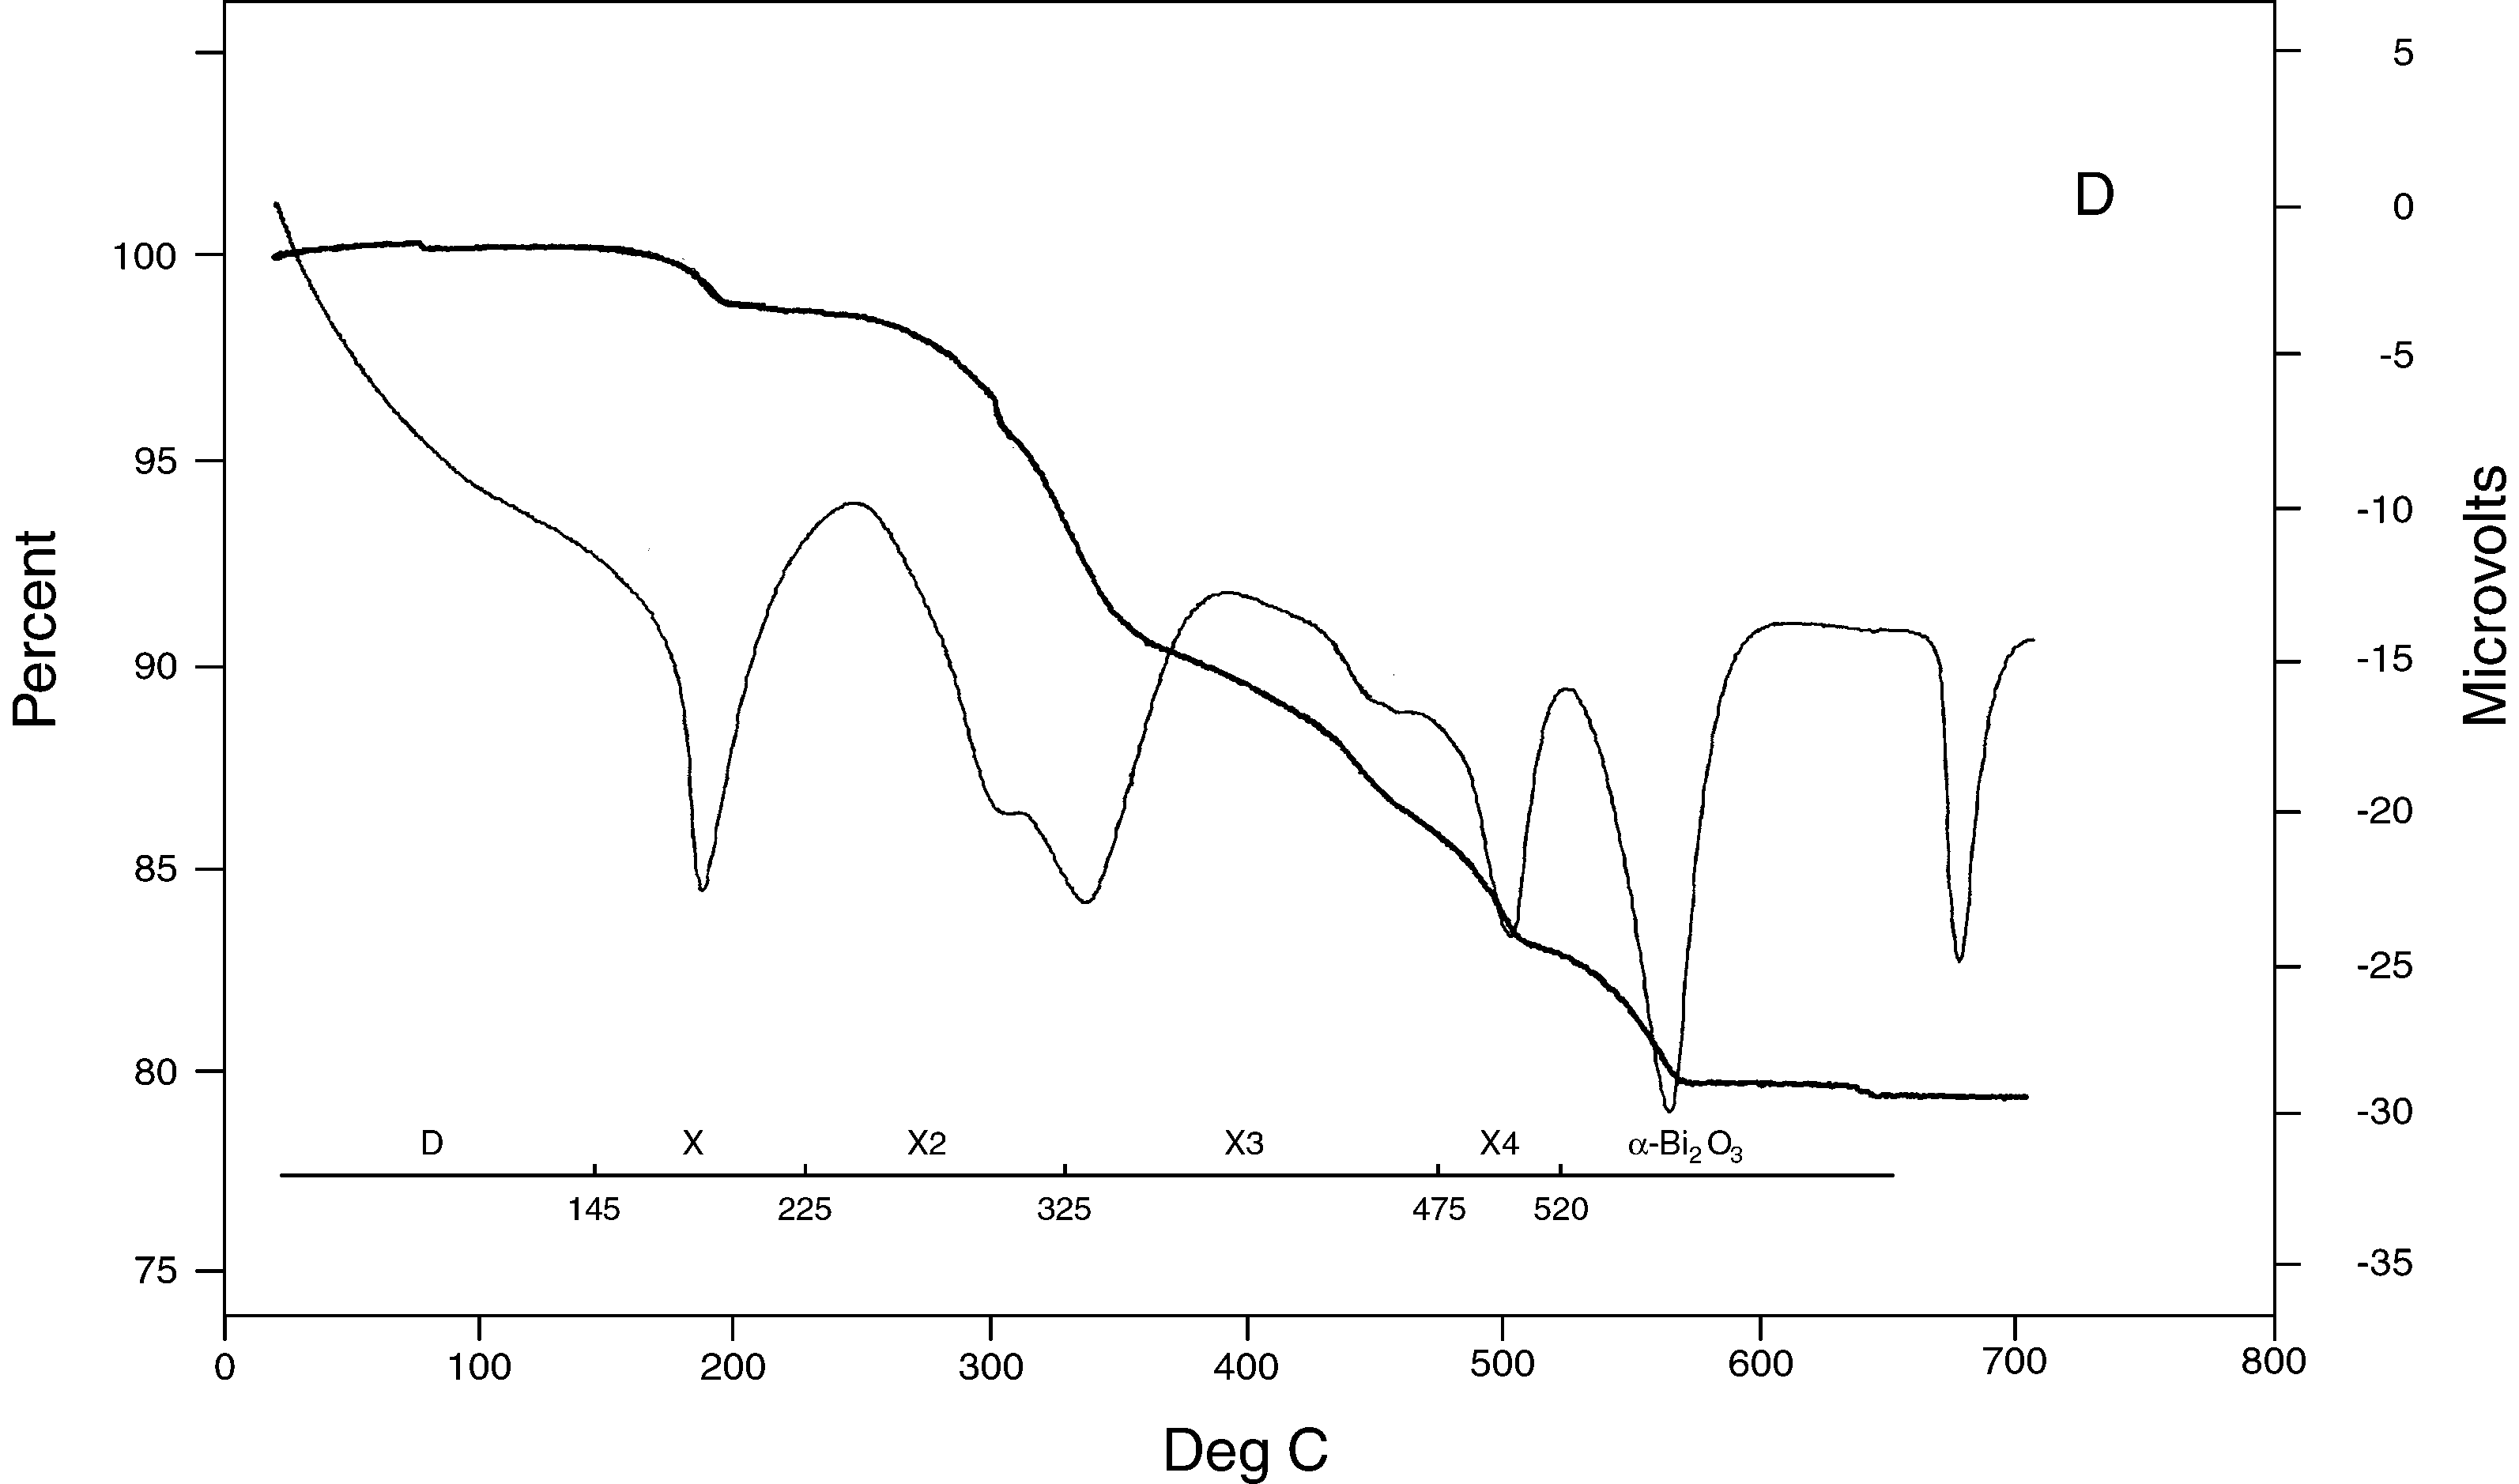


Fig. S1. TGA-DTA diagrams for the compound **D**.


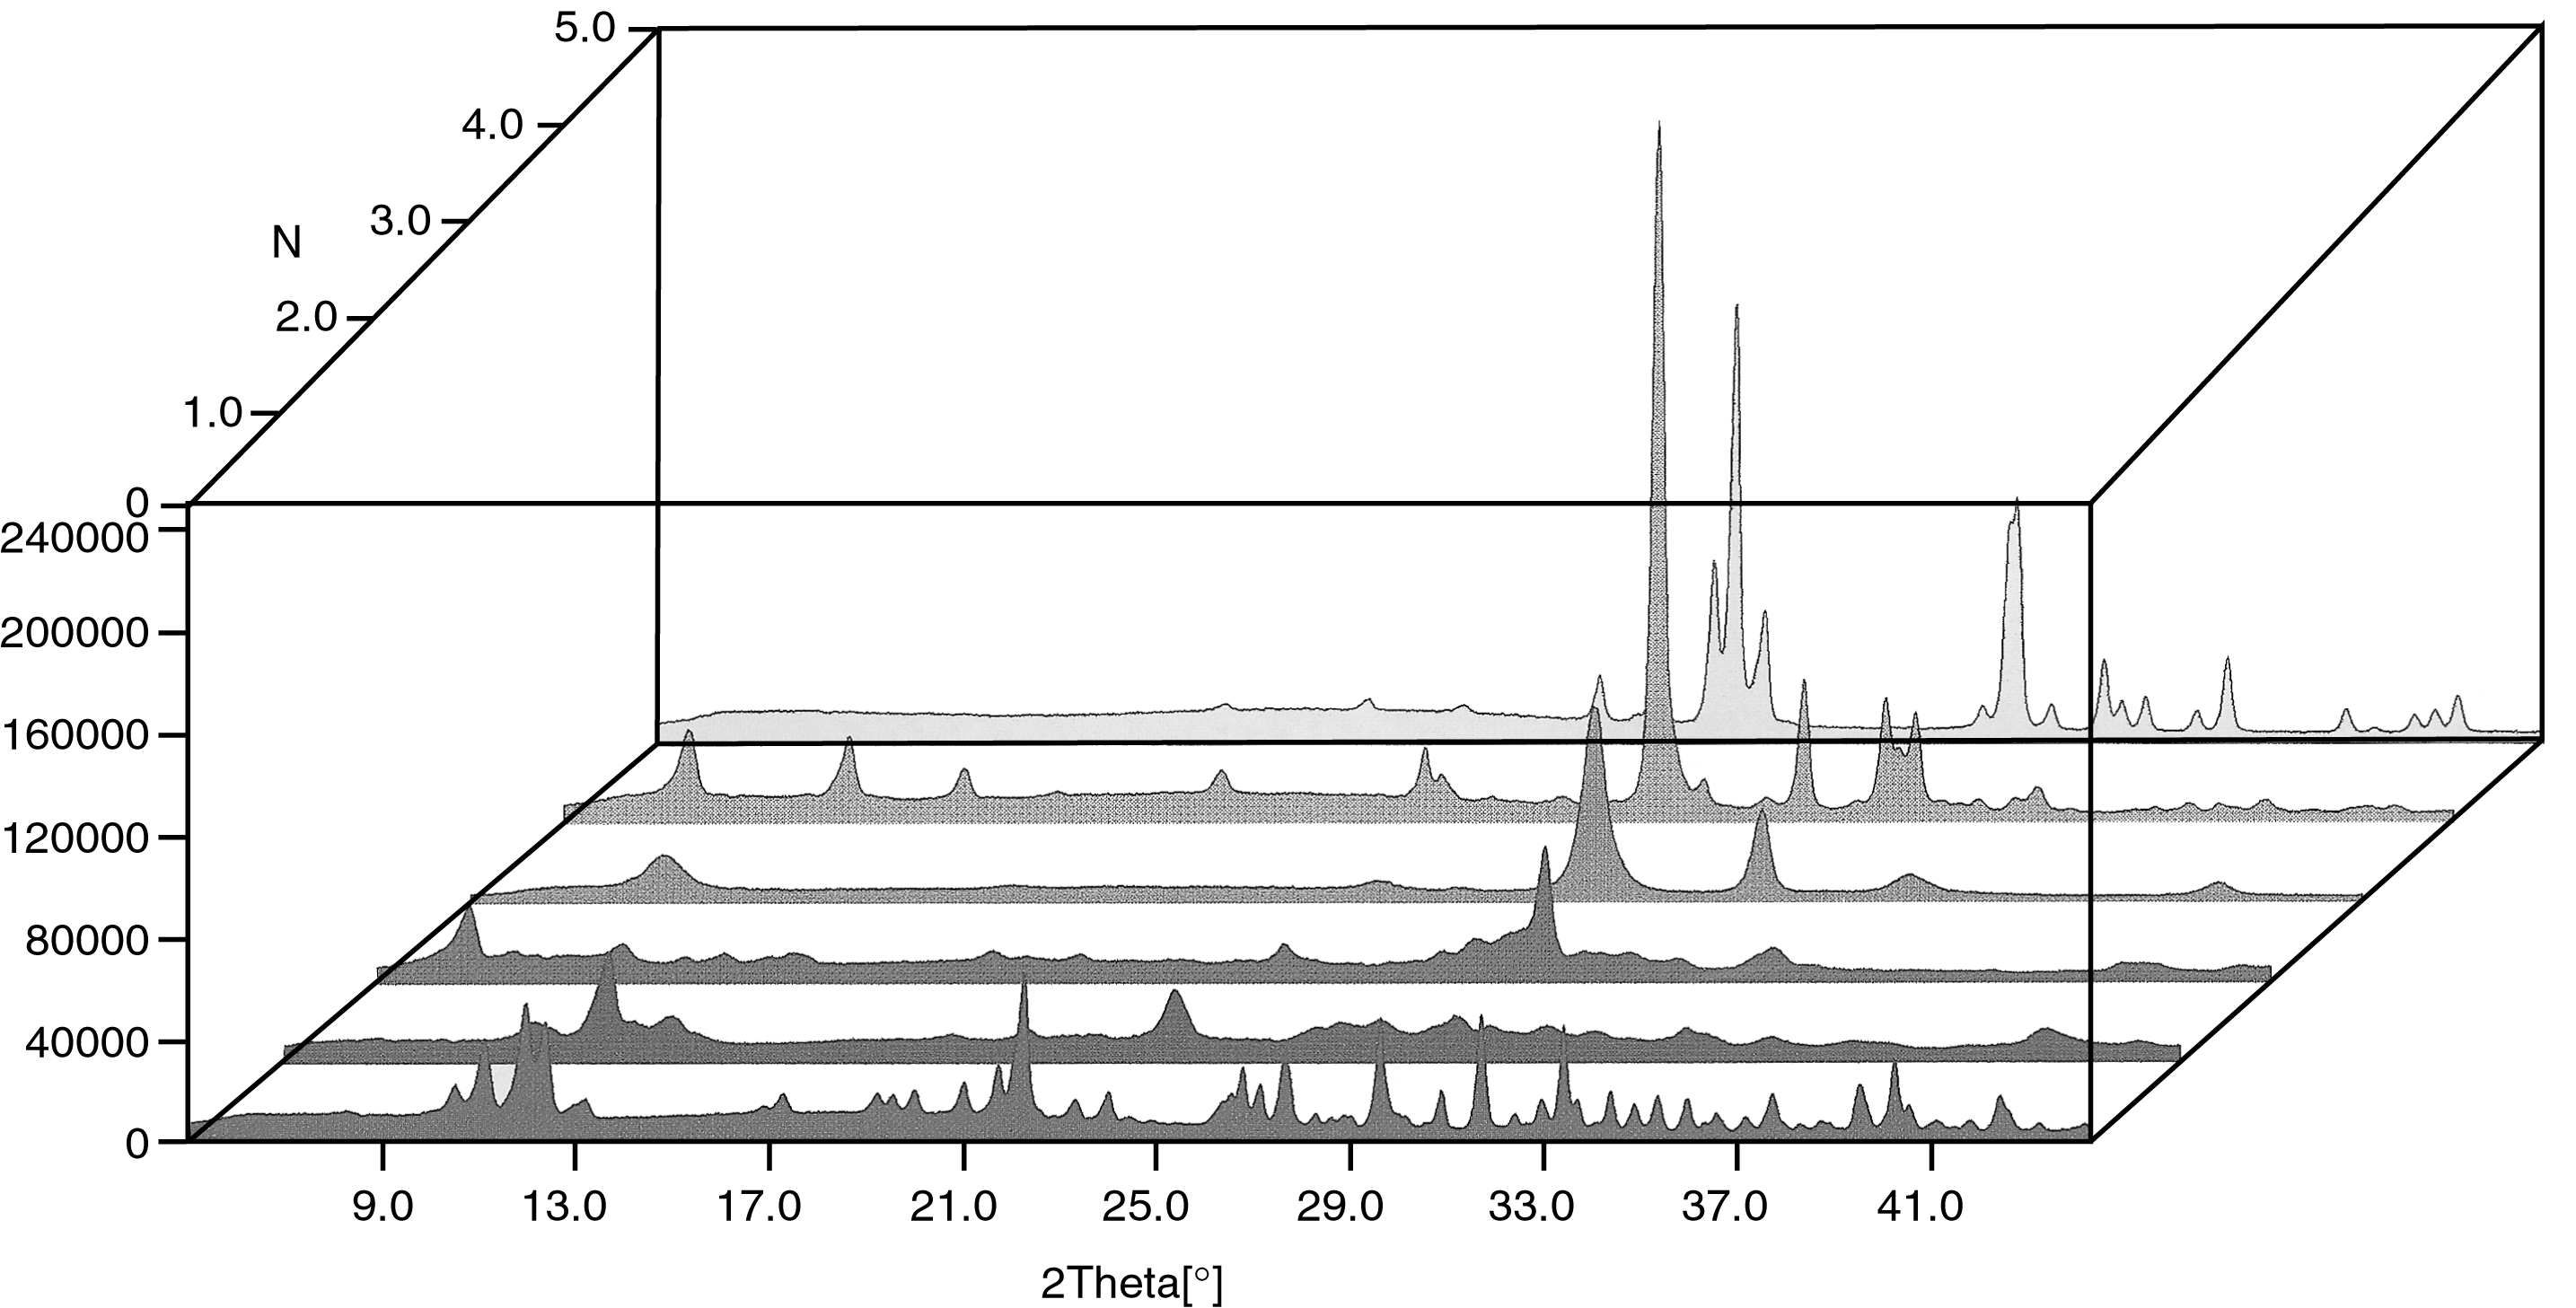


Fig. S2. X-Ray powder patterns of **D** and the decomposition products **X1**, **X2**, **X3**, **X4**, and -Bi2O3.


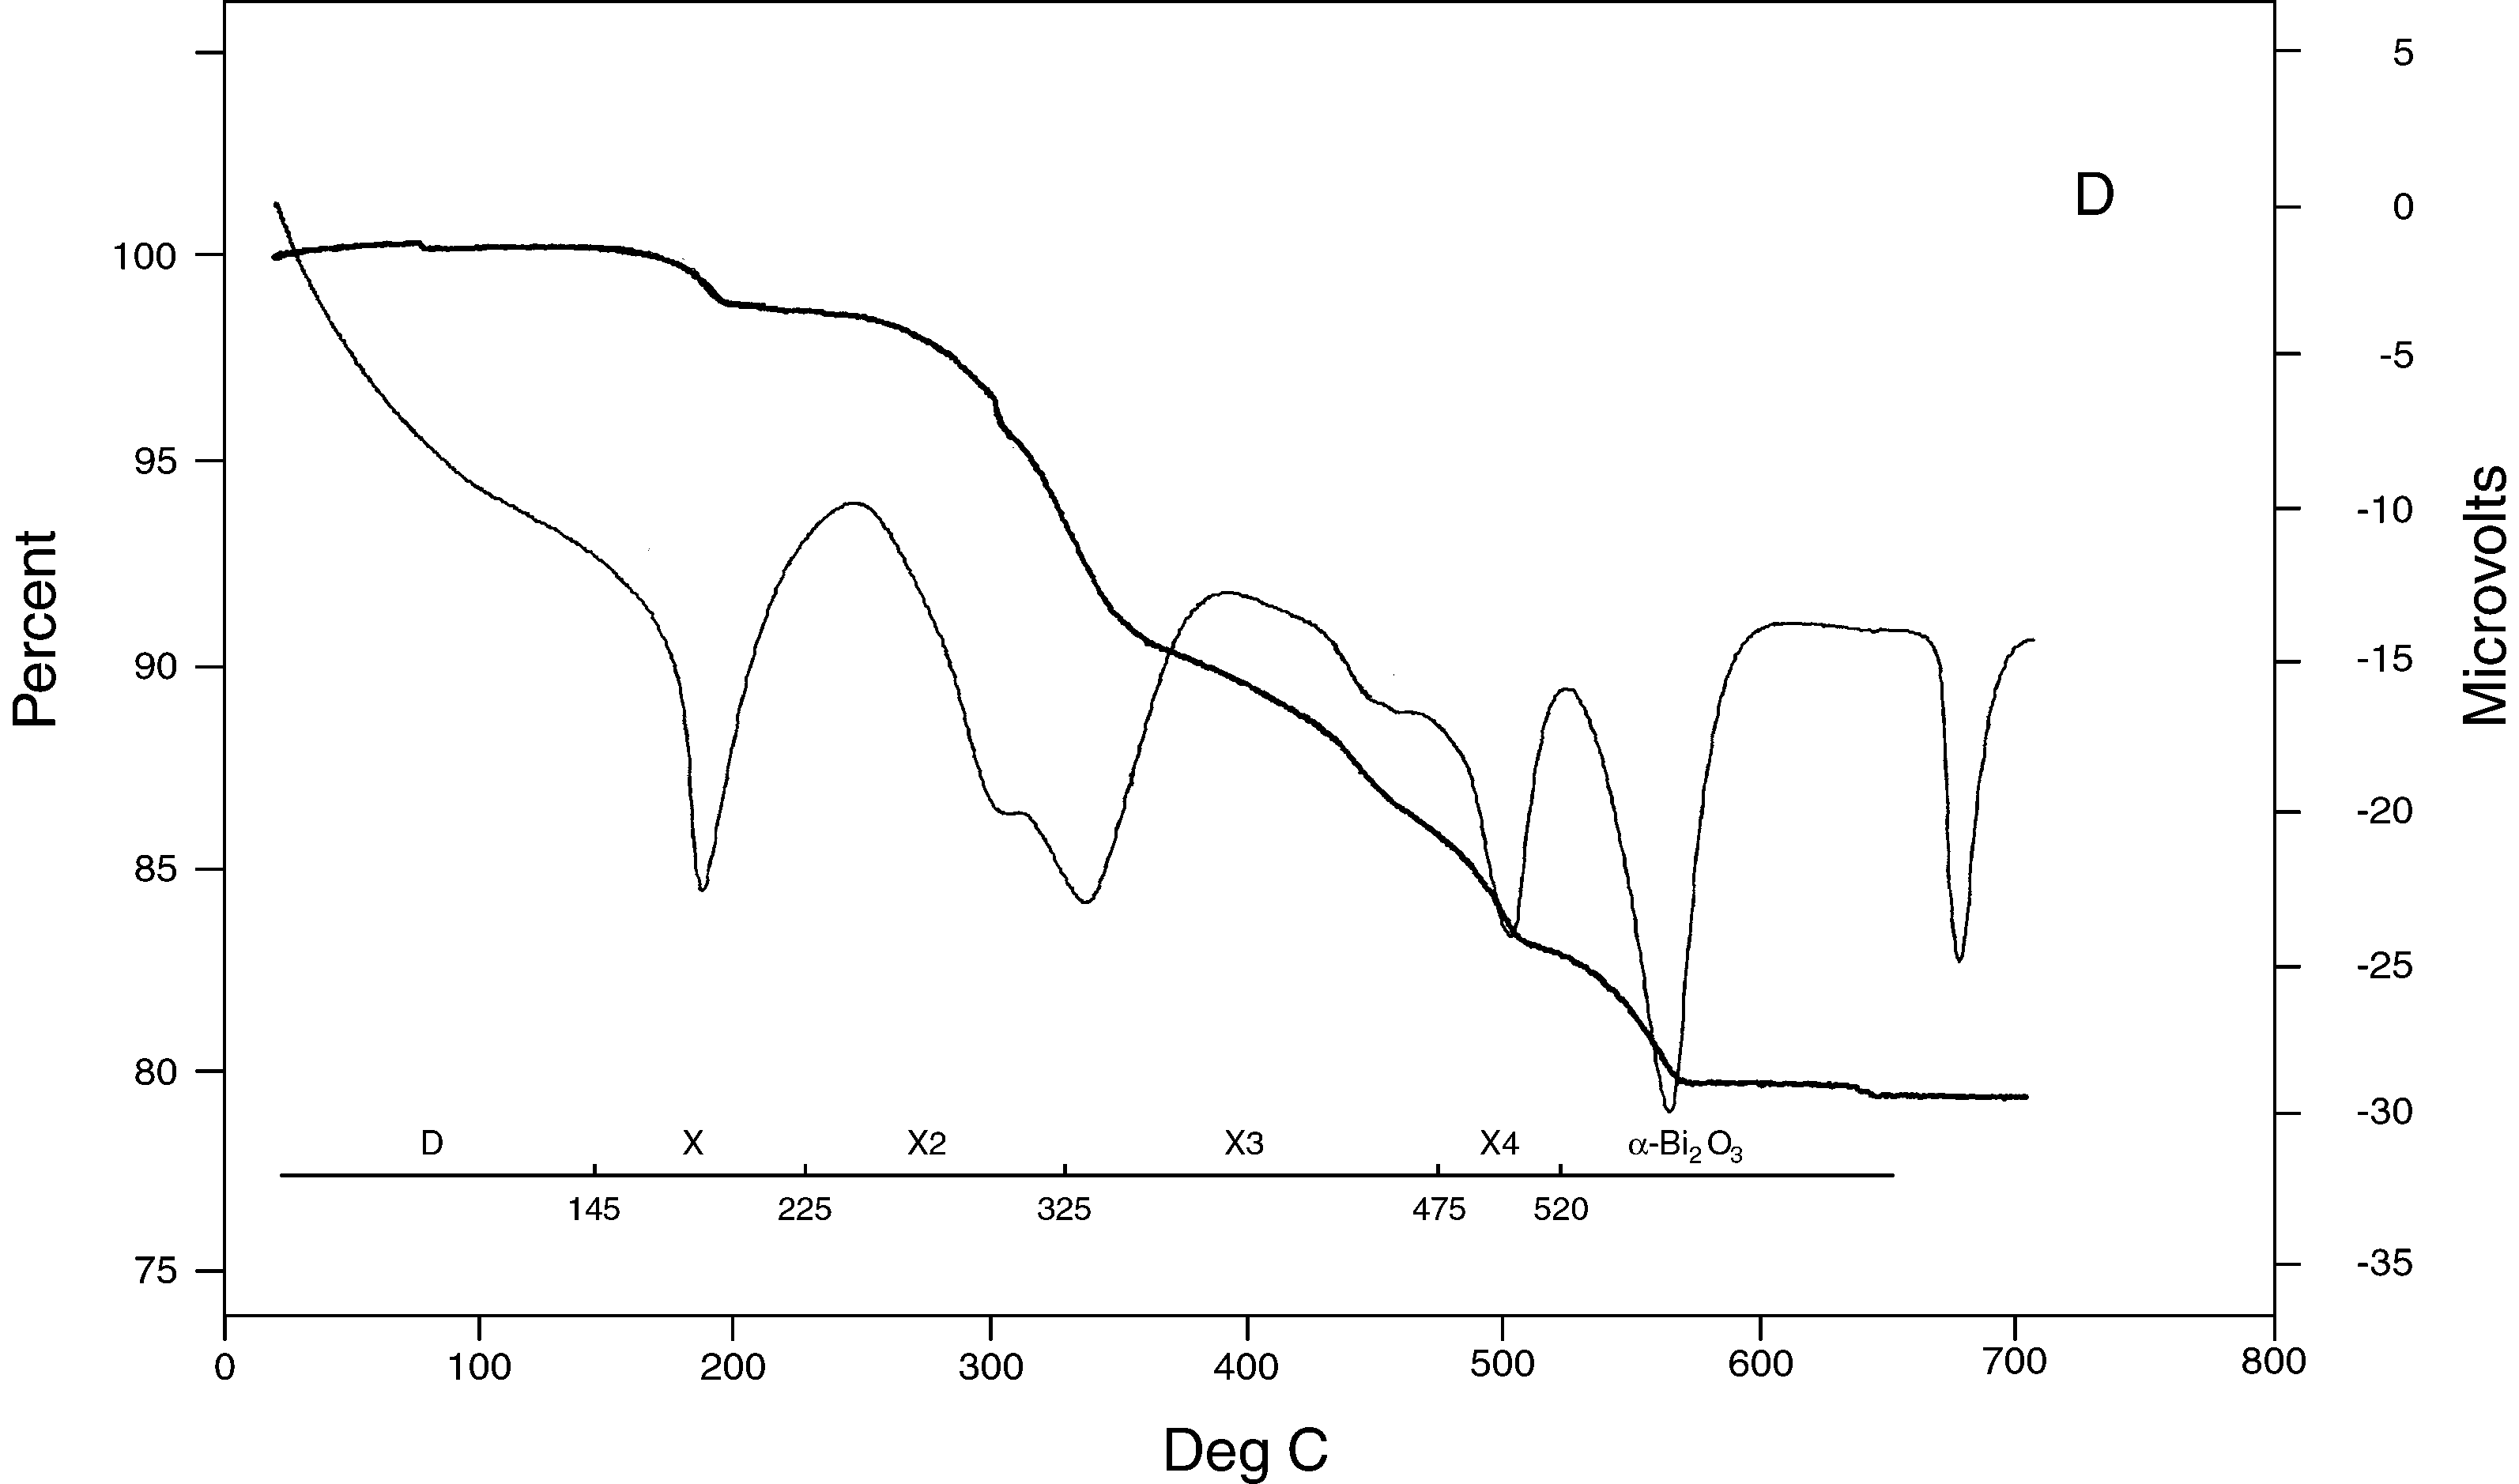


Fig. S3. TGA-DTA diagrams for the compound **X**.


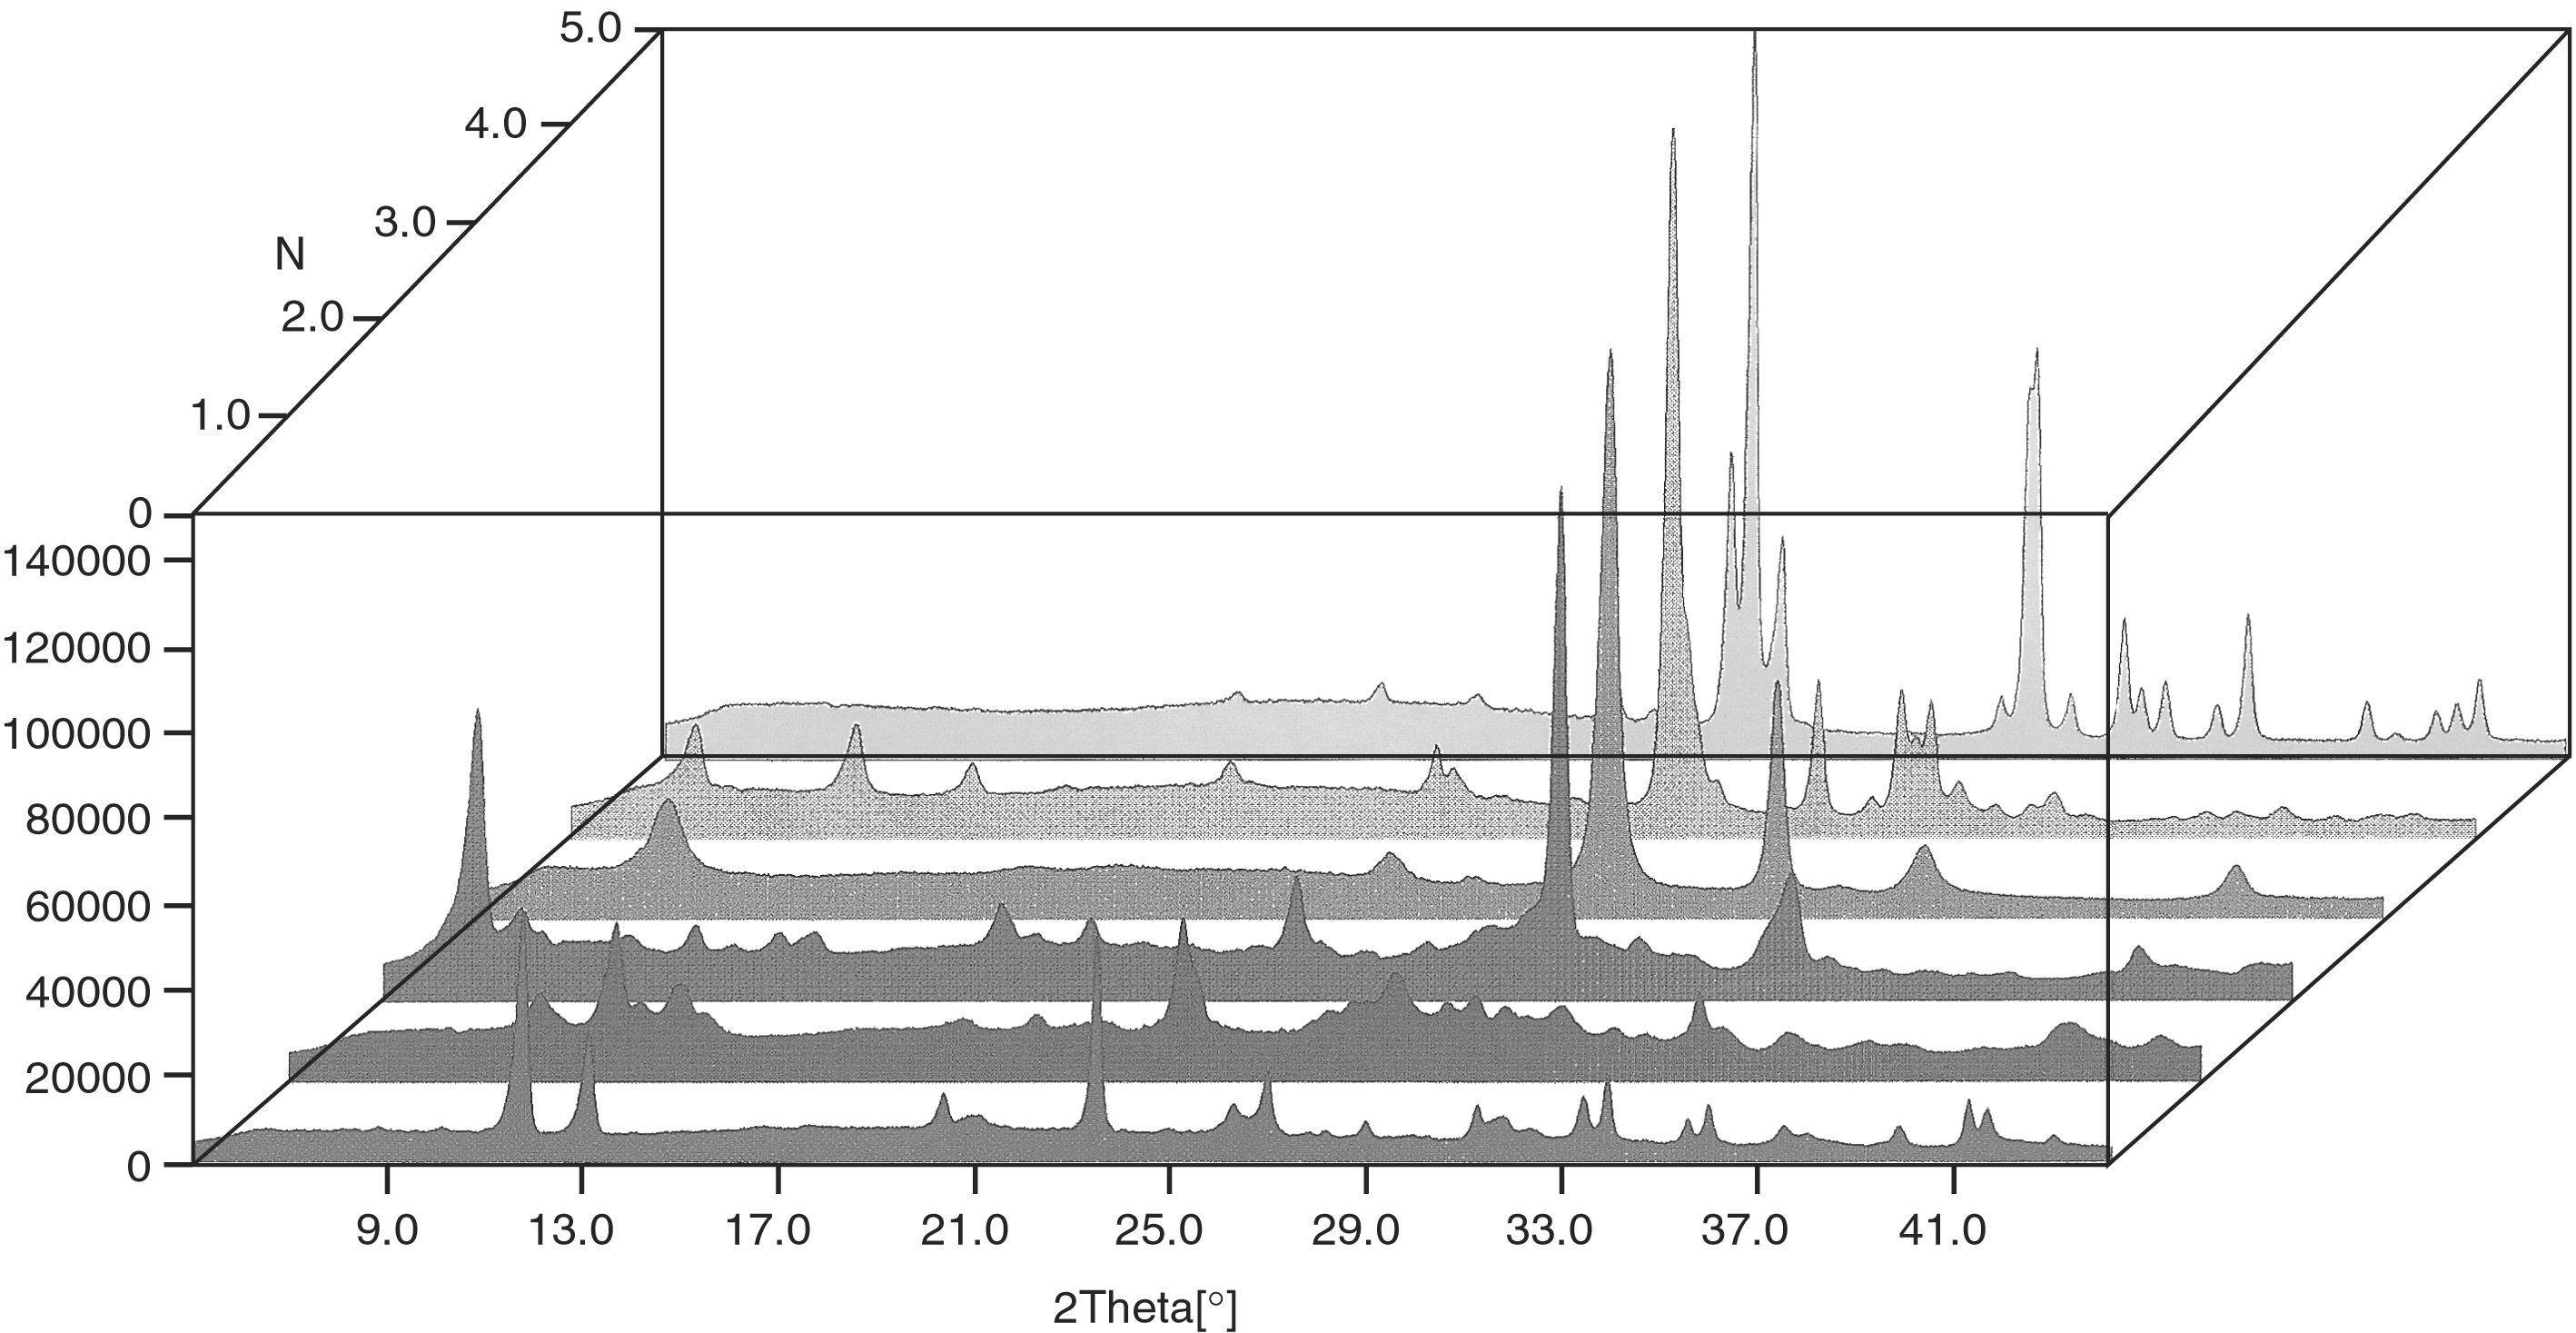


Fig. S4. X-Ray powder pattern of **X** and the decomposition products **X1**, **X2**, **X3**, **X4**, and -Bi2O3.


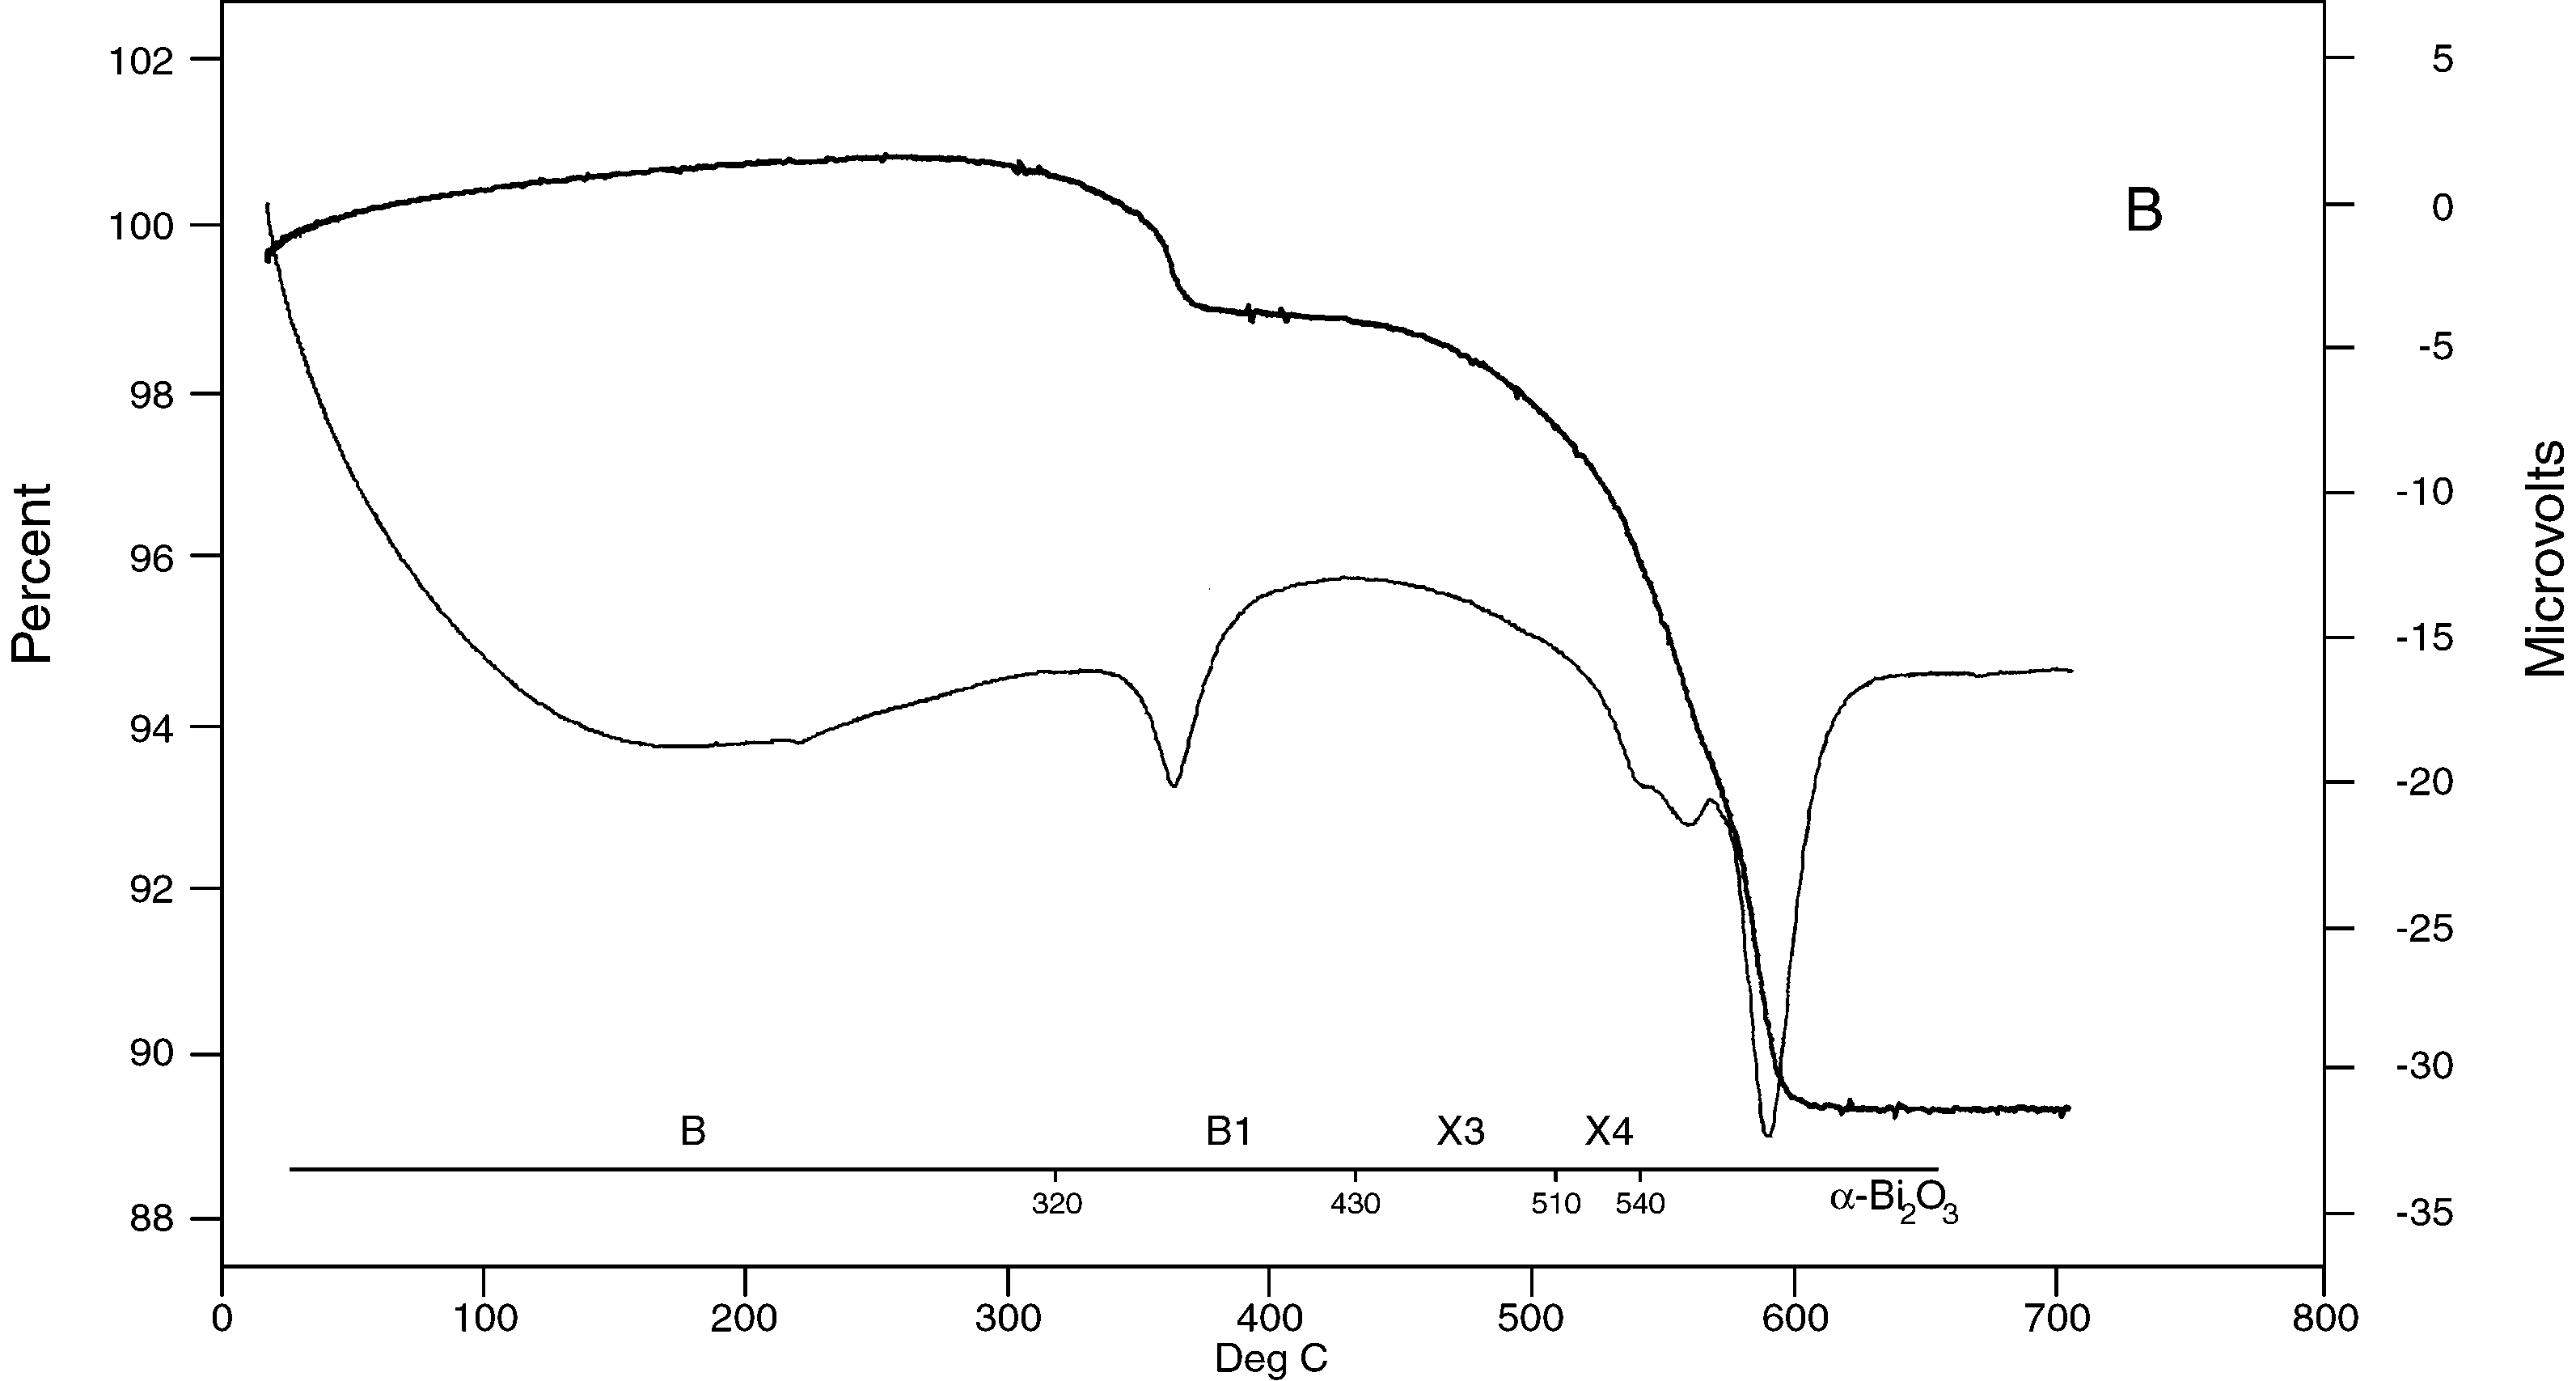


Fig. S5. TGA-DTA diagrams for the compound **B**.


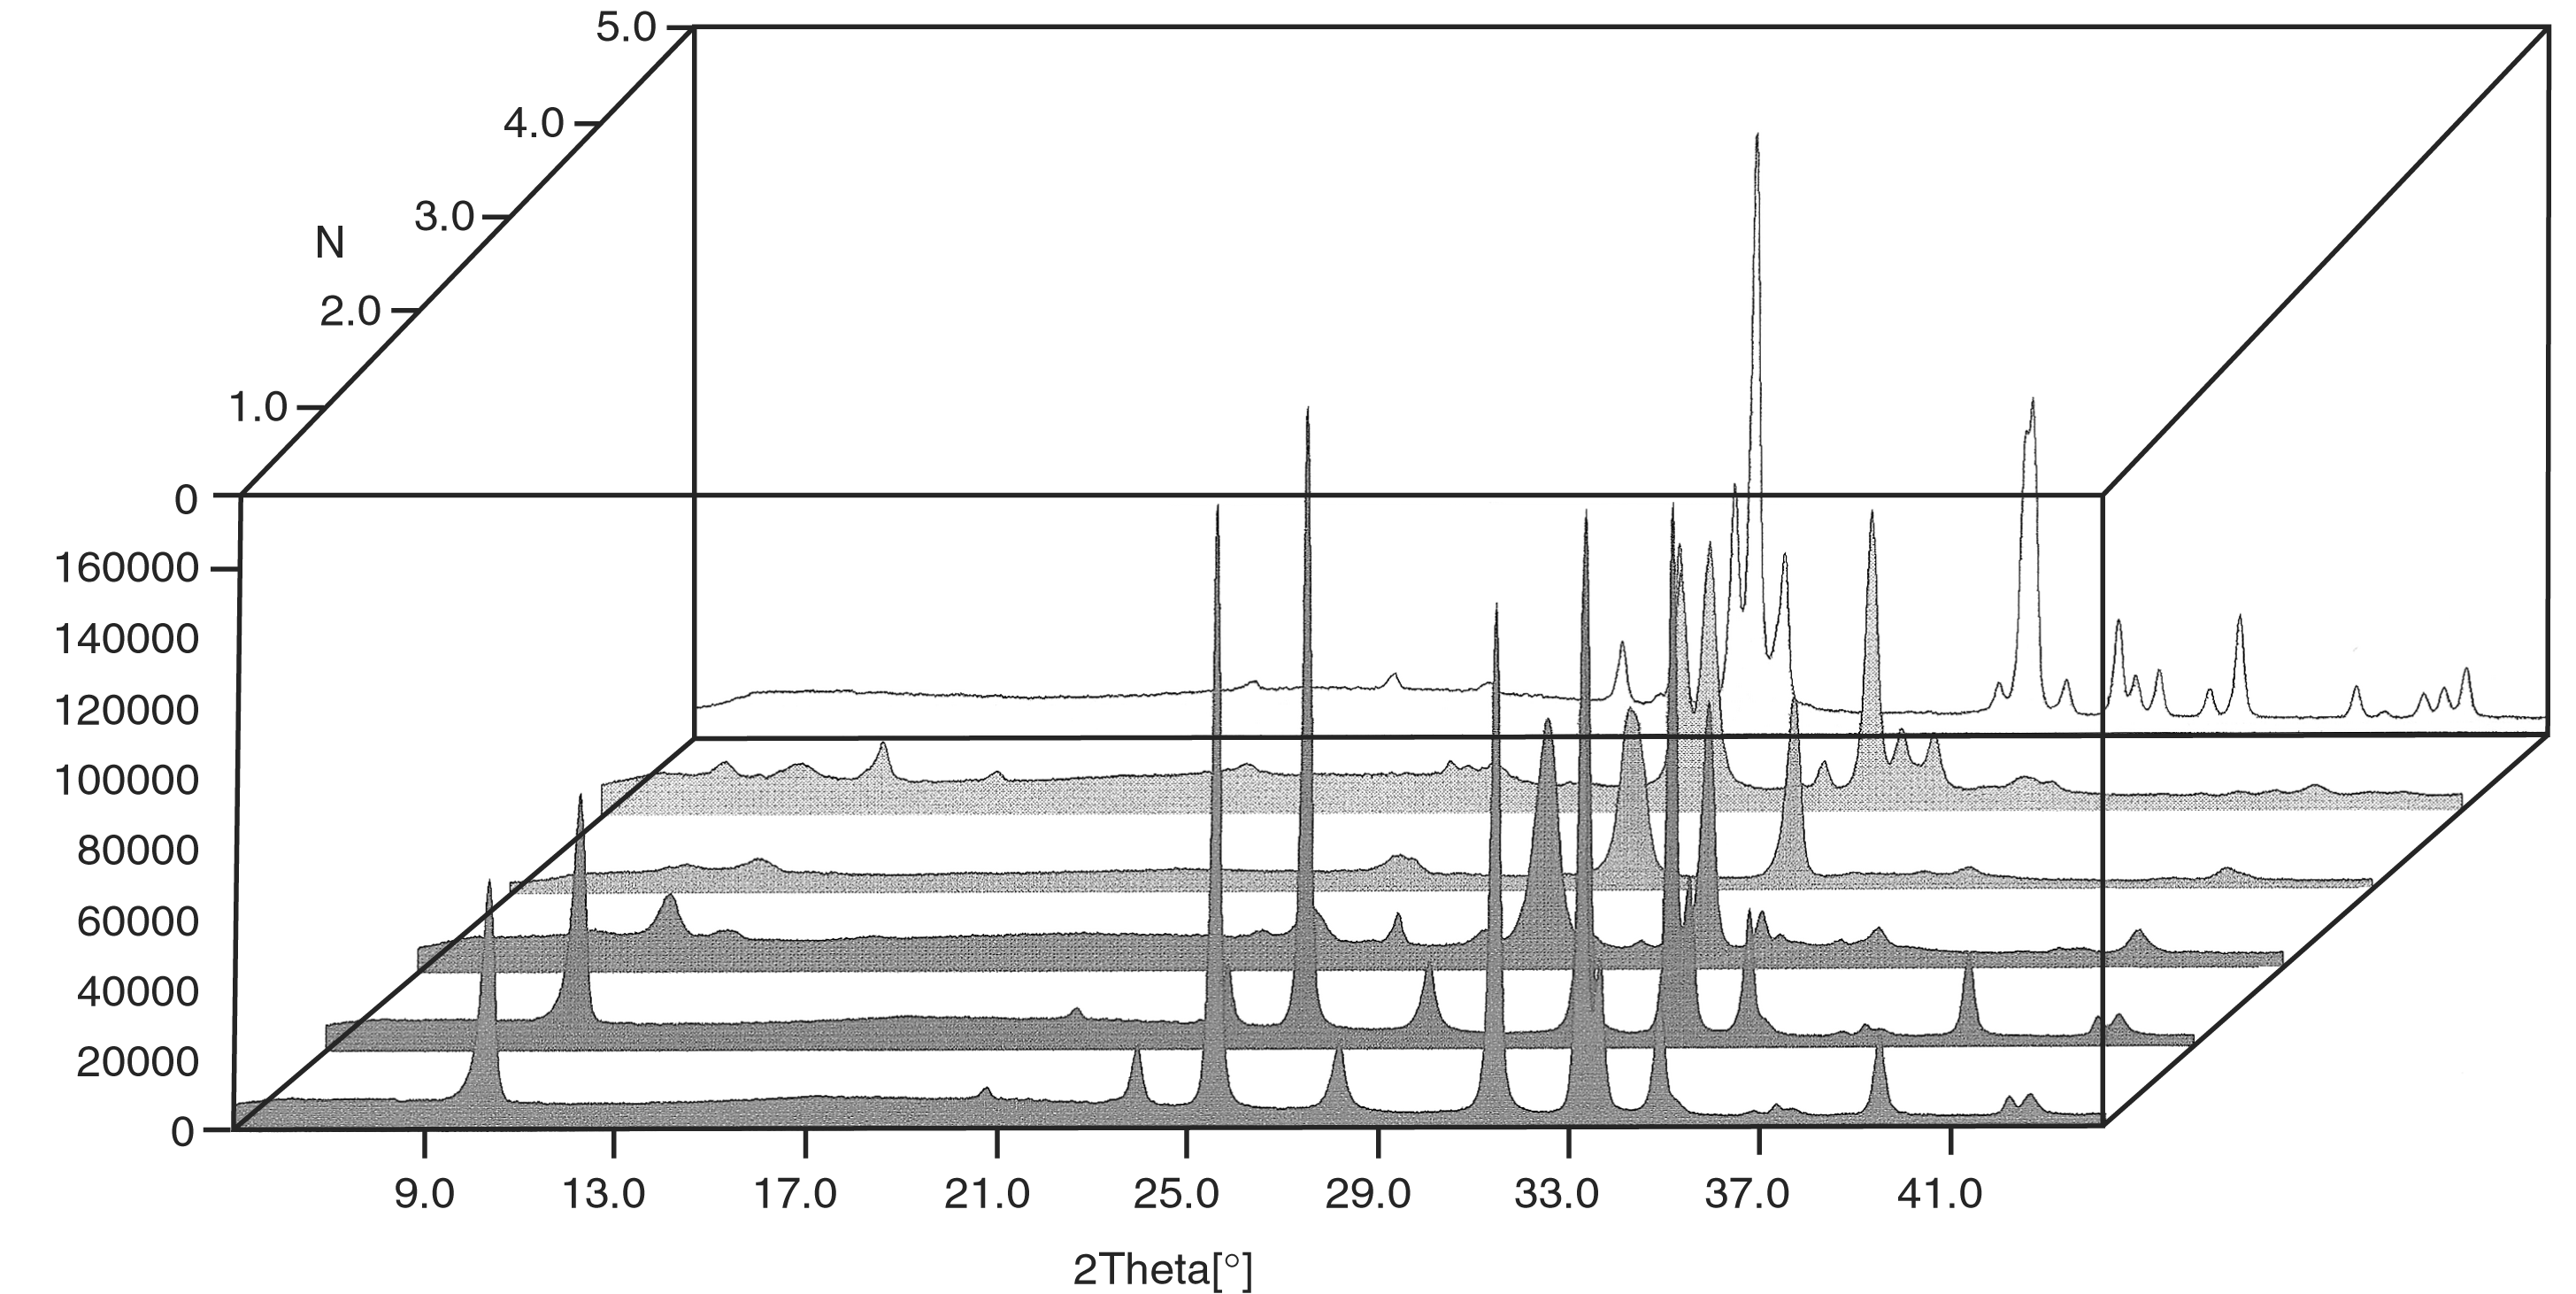


Fig. S6. X-Ray powder patterns of the compounds **B**, **B**, **B1**, **X3**, **X4** (with impurity of **X3**), and -Bi2O3.


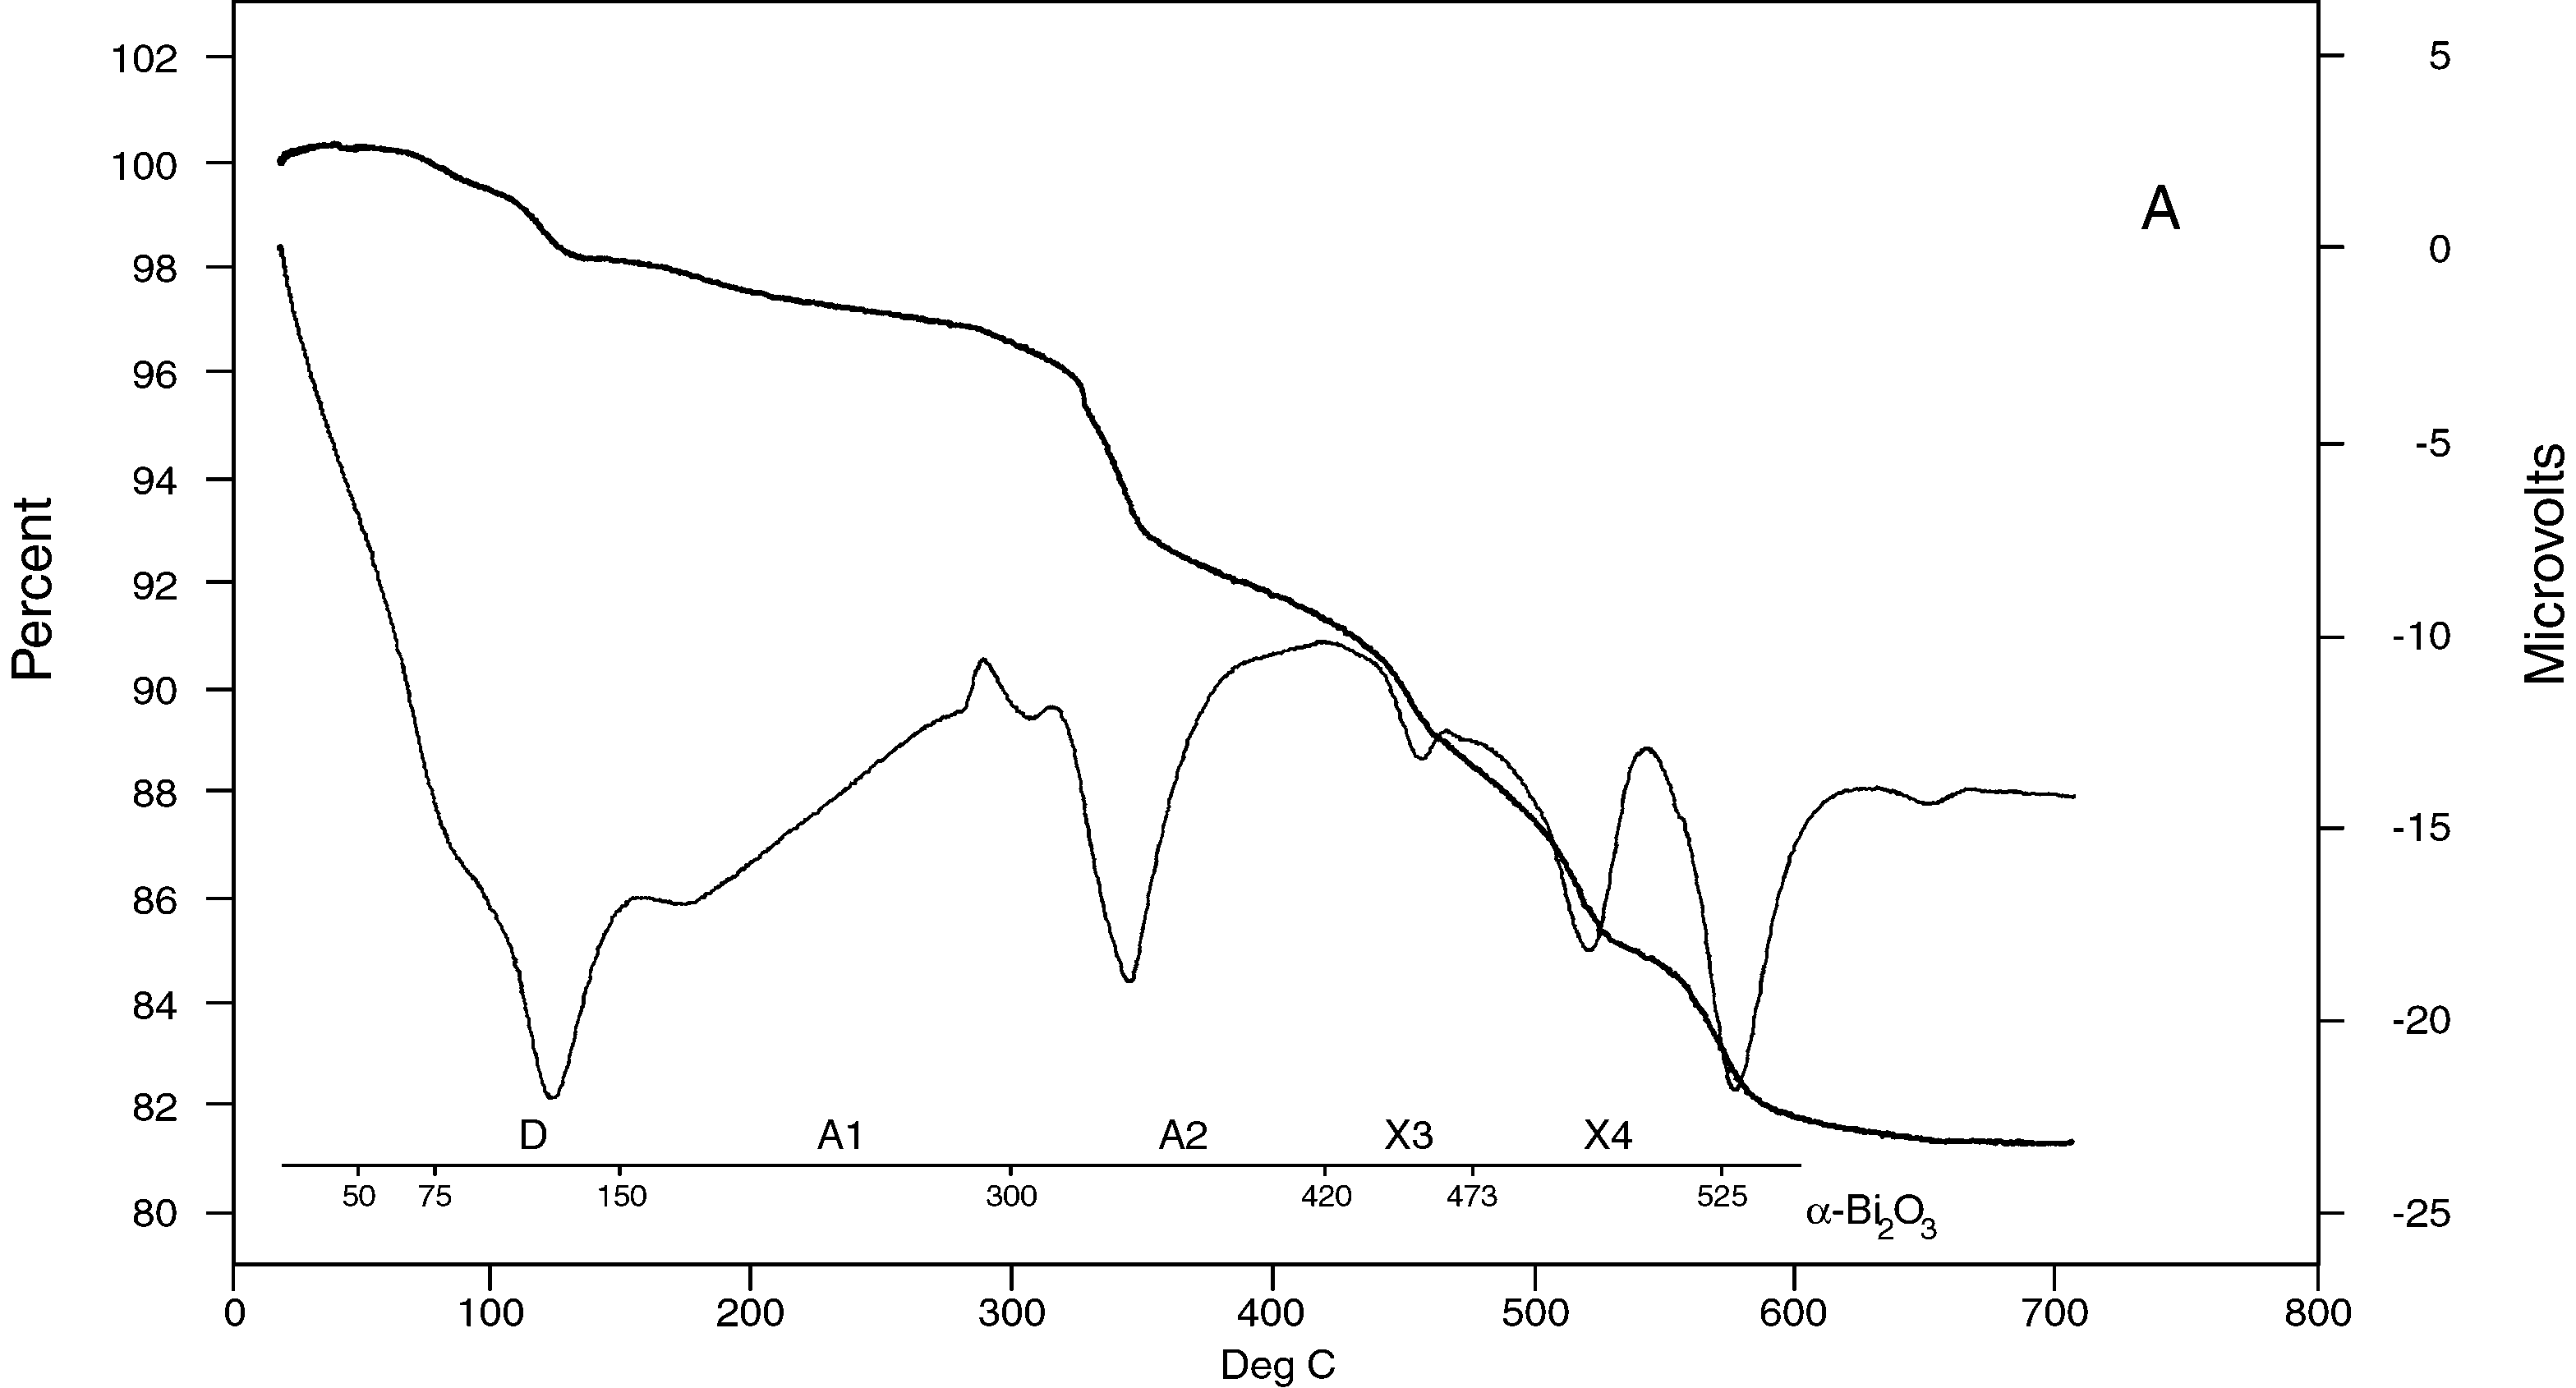


Fig. S7. TGA-DTA diagrams of the compound **A**.


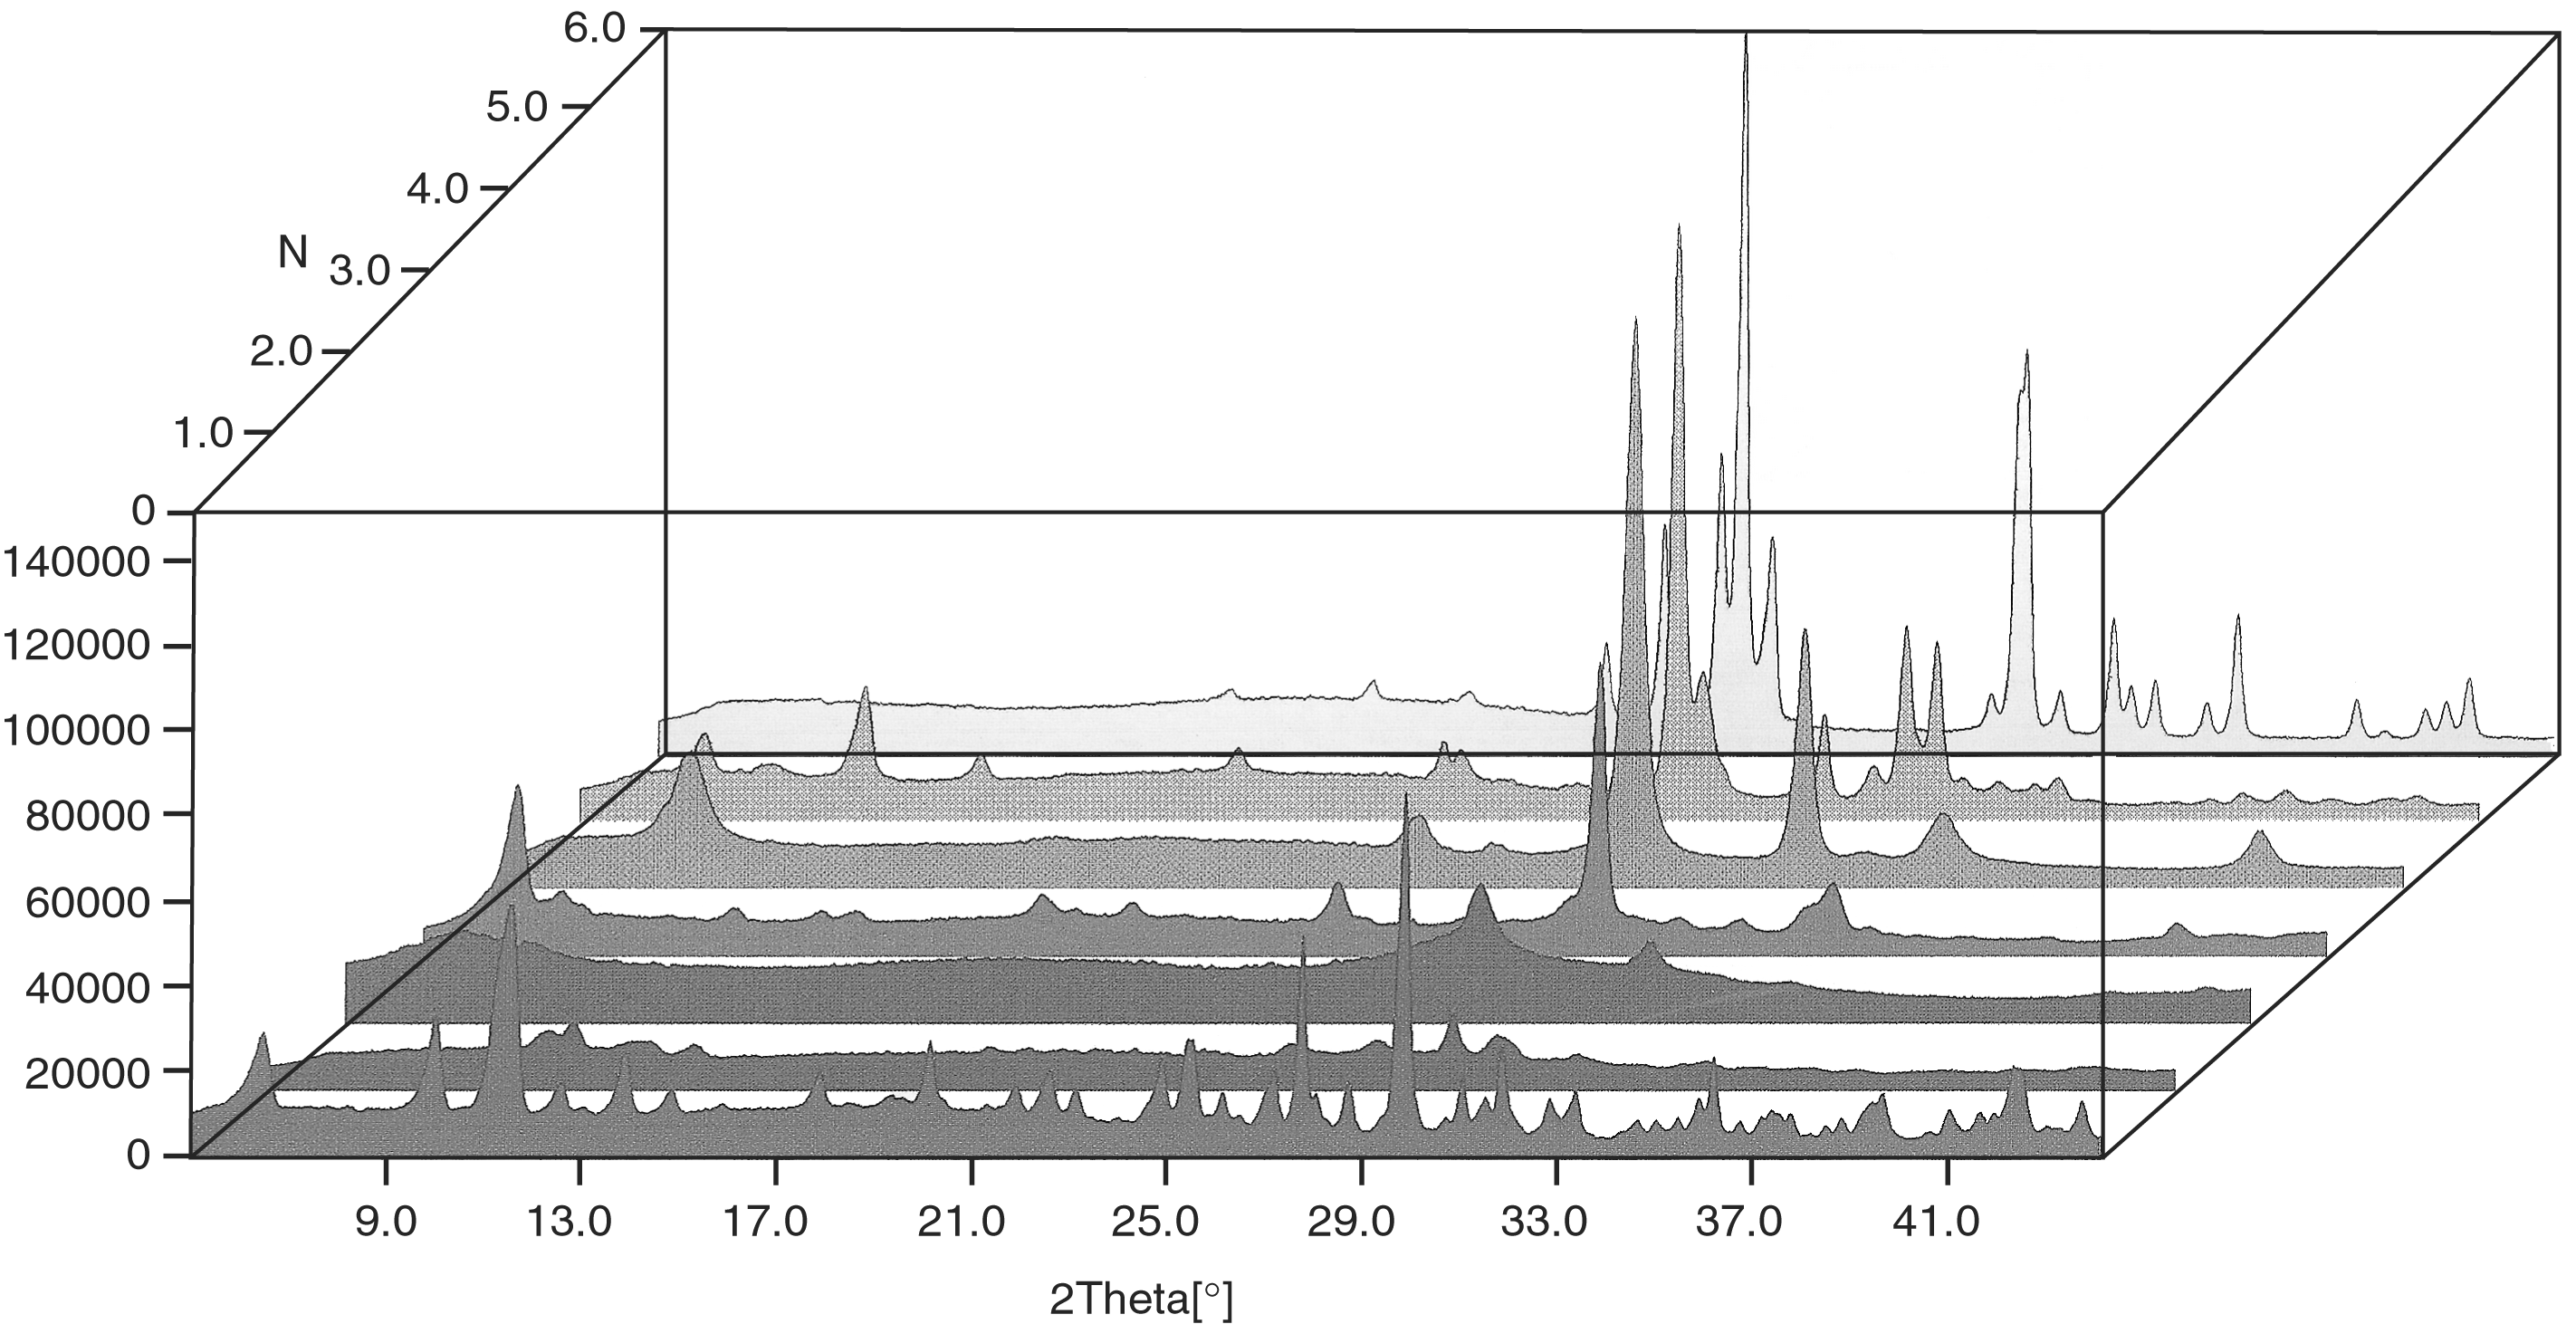


Fig. S8. X-Ray powder patterns of **A** and the decomposition products **A1**, **A2**, **X2**, **X3**, **X4**, and -Bi2O3.
